1 **Evidence that faecal carriage of resistant *Escherichia coli* by 16-week-old dogs**  
2 **in the United Kingdom is associated with raw feeding and that *E. coli* from**  
3 **these dogs are shared with humans and cause opportunistic infections.**

4

5 **Oliver Mounsey<sup>1\*</sup>, Kezia Wareham<sup>2\*</sup>, Ashley Hammond<sup>3</sup>, Jacqueline Findlay<sup>1</sup>,**  
6 **Virginia C. Gould<sup>1,2</sup>, Katy Morley<sup>2</sup>, Tristan A. Cogan<sup>2</sup>, Katy M.E. Turner<sup>2,3</sup>,**  
7 **Matthew B. Avison<sup>1‡#</sup>, Kristen K. Reyher<sup>2‡</sup>**

8

9 **<sup>1</sup>University of Bristol School of Cellular & Molecular Medicine, Biomedical**  
10 **Sciences Building, University Walk, Bristol. BS8 1TD.**

11 **<sup>2</sup>University of Bristol Veterinary School, Langford House, Langford, Bristol.**  
12 **BS40 5DU**

13 **<sup>3</sup>University of Bristol Medical School, Population Health Sciences, Canynge**  
14 **Hall, 39 Whatley Road, Bristol. BS8 2PS**

15

16 **\*O.M. and K.W. contributed equally to this work.**

17 **‡M.A. and K.R. contributed equally to this work.**

18

19 **#Correspondence: Matthew B. Avison, School of Cellular & Molecular**  
20 **Medicine, University of Bristol. Bristol BS8 1TD. United Kingdom.**

21 **bimba@bris.ac.uk.**

22 **Abstract**

23 **We report a survey (August 2017 to March 2018) and risk factor analysis of**  
24 **faecal carriage of antibacterial-resistant (ABR) *Escherichia coli* in 223 sixteen-**  
25 **week-old dogs in the United Kingdom. Raw feeding was associated with the**  
26 **presence of *E. coli* resistant to fluoroquinolones, tetracycline, amoxicillin, and**  
27 **streptomycin, but not to cefalexin or cefotaxime. Whole genome sequencing of**  
28 **30 fluoroquinolone-resistant (FQ-R), 22 cefotaxime-resistant (CTX-R) and**  
29 **seven dual FQ-R/CTX-R *E. coli* isolates showed a wide range of sequence**  
30 **types (STs), an approximately 50:50 split of CTX-M:AmpC-mediated CTX-R,**  
31 **and almost exclusively mutational FQ-R dominated by ST744 and ST162.**  
32 **Comparisons between *E. coli* isolates from puppies known to be located within**  
33 **a 50 x 50 km region with those isolated from human urinary tract and**  
34 **bloodstream infections (isolated in parallel in the same region) identified a**  
35 **clone of ST963 *E. coli* carrying chromosomal *bla*<sub>CMY-2</sub> in two puppies and**  
36 **causing two urinary tract infections and one bloodstream infection.**  
37 **Furthermore, an ST744 FQ-R clone was carried by one puppy and caused one**  
38 **urinary tract infection. Accordingly, we conclude that raw feeding is**  
39 **associated with carriage of ABR *E. coli* in dogs even at sixteen weeks of age**  
40 **and that bacteria carried by these dogs are shared with humans and cause**  
41 **serious opportunistic infections. We therefore suggest that those who feed**  
42 **their dogs raw meat seriously consider the potential ABR-transmission threat**  
43 **their pet may become as a result and deploy appropriate hygiene practices in**  
44 **mitigation.**

## 45 **Introduction**

46 Antimicrobial resistance and particularly antibacterial resistance (ABR) has many  
47 negative impacts on the health and welfare of humans and animals including  
48 increased morbidity and mortality and an increase in treatment costs (1). ABR is  
49 linked across human populations, animal populations and the environment, and it is  
50 possible for ABR bacteria - or ABR genes that they carry - to be passed between  
51 these realms (2). Previous research has indicated that farmed animals act as  
52 reservoirs of ABR bacteria that can be transmitted to humans either through the food  
53 chain, through direct contact between humans and animals or via the environment  
54 (3,4).

55 In many countries, particularly in urban areas, interaction between humans and farm  
56 animals – directly or via the environment – is limited. This may explain why studies  
57 using whole genome sequencing (WGS) have found little evidence that sharing of  
58 ABR bacteria between farmed animals and humans is a significant problem (5-8).  
59 However, close interaction between humans and domestic animals is common in  
60 such areas. Accordingly, it may be that for many people around the world, a pet dog  
61 is a more likely source of ABR bacteria than are farmed animals. Indeed, ABR  
62 bacteria found in domestic pets and their owners are often indistinguishable (9-12). A  
63 key ABR pathogen of relevance is *Escherichia coli*, which is carried in the intestines  
64 of humans, farmed and companion animals, and causes a significant disease burden  
65 in all three, and especially in humans (13).

66 There are several ways that dogs may become colonised by ABR *E. coli* and so  
67 bring them into the home. Ingestion is an essential part of colonisation; therefore,  
68 ingestion of faeces or faecally contaminated food or water by dogs may be a key

69 source of ABR bacteria derived from humans and farmed animals. For example,  
70 farm animal manure is often spread on pastureland where dogs might be exercised.  
71 Wastewater from farm run-off or from human sewage outlets may introduce *E. coli* to  
72 fresh and sea water where dogs might bathe (14,15). Meat can be contaminated with  
73 animal faeces during slaughter, and if eaten in its raw form by a dog, may lead to *E.*  
74 *coli* colonisation (16). Research has also suggested that dogs become colonised by  
75 ABR bacteria when visiting veterinary hospitals, which act as reservoirs for multi-  
76 drug resistant (MDR) organisms, and particularly if the dog receives antibacterial  
77 therapy (17-19). Recent research examining 374 veterinary practices in the UK  
78 estimated that during the two years investigated, around 25% of approximately one  
79 million pet dogs registered received at least one antibacterial course. Of dog  
80 antibacterial usage in this study, 60% was classified as use of a 'critically important'  
81 medicine as defined by WHO criteria (20).

82 Overall, ABR bacteria have been detected in both healthy and sick adult dogs and  
83 associations have been found between increased carriage of ABR bacteria and  
84 exposure to antibacterials (19). Associations have also been found between  
85 increased carriage of ABR bacteria following veterinary healthcare in general as well  
86 as with coprophagia and with the feeding of raw poultry (21-25). Of direct relevance  
87 to the present study, two UK studies have identified associations between ABR in  
88 faecal *E. coli* of adult dogs and those dogs being fed raw meat (21,24).

89 Up to now, there has not been any published work reporting very early life risk  
90 factors for carriage of ABR *E. coli* in domestic pet dogs. In the UK, current  
91 recommendations are for juvenile dogs to be weaned onto solid food and receive a  
92 core vaccination at six to eight weeks of age and then receive booster vaccinations  
93 every two to four weeks until 16 weeks of age (26). Dogs should stay with their

94 mother until eight weeks of age, and owners are usually advised not to walk their  
95 dog outside in public places until after the dog has had its second vaccination  
96 (approximately 12 weeks of age).

97 In this study, risk factors were investigated to explore associations between various  
98 lifestyle factors and the detection of ABR *E. coli* in faecal samples taken from dogs at  
99 16 weeks of age. Practices and behaviours that might increase ingestion of faecal  
100 bacteria from the environment or food were particularly considered. Furthermore,  
101 WGS was used to characterise ABR isolates. The focus was specifically on  
102 resistance to critically important antibacterials: 3<sup>rd</sup> generation cephalosporins (3GC),  
103 e.g., cefotaxime (CTX) and fluoroquinolones. CTX resistant (CTX-R) and  
104 fluoroquinolone resistant (FQ-R) *E. coli* carried by a sub-set of puppies were  
105 compared with those cultured from human urinary tract and bloodstream infections  
106 collected in parallel within the same 50 x 50 km region, to investigate whether there  
107 is evidence of transmission.

108

## 109 **Results and Discussion**

### 110 *Risk factors for carriage of ABR *E. coli* in dogs at 16 weeks of age*

111 In total, 295 dogs were recruited and data for 223 dogs were included in the  
112 analysis. Submissions were excluded if the questionnaire was not fully completed  
113 (n=14) or because the faecal sample did not grow enough *E. coli* to be sure of ABR  
114 status as defined in Experimental (n=58). For each of the 223 included faecal  
115 samples, ABR *E. coli* carriage status was categorised as positive or negative for  
116 resistance to five test antibacterials: amoxicillin, cefalexin, ciprofloxacin,  
117 streptomycin, or tetracycline, as set out in Experimental. In a preliminary Chi-

118 squared analysis, the only significant risk factor identified for 16-week-old dogs  
119 providing faecal samples carrying *E. coli* resistant to at least one antibacterial was  
120 having been fed raw food ( $p < 0.001$ ; **Table 1**). Subsequent univariable and  
121 multivariable logistic regression analyses showed a strong association between raw  
122 feeding and carriage of *E. coli* resistant to any one of the five antibacterials tested as  
123 well as individually with resistance to each of the antibacterials tested except  
124 cefalexin (**Table 2**).

125 The most substantial risk associated with raw feeding in 16-week-old dogs was that  
126 of carriage of FQ-R *E. coli* (**Table 2**). This association has previously been reported  
127 in adult dogs in the UK; a study based on 445 dogs found that feeding raw poultry  
128 significantly increased the risk of carrying FQ-R *E. coli* in faeces (22). Findings from  
129 the present study extend these earlier studies to show that the impact of raw feeding  
130 on ABR *E. coli* carriage can be seen as early as 10 weeks after the first introduction  
131 of solid food. Faecal samples taken from broilers at a slaughterhouse commonly  
132 contain FQ-R *E. coli* (27) and raw chicken imported into (28) and produced in the UK  
133 (29) have been identified as contaminated with FQ-R *E. coli*. Feeding raw chicken  
134 could therefore be a source of FQ-R *E. coli* in our study, as has been seen with adult  
135 dogs (22), but this remains to be confirmed. The risk of dogs acquiring ABR bacteria  
136 from meat would be mitigated simply by cooking that meat to reduce any  
137 contamination with faecal bacteria that occurs at slaughter and during processing.

138

### 139 *Molecular epidemiology of CTX-R and FQ-R E. coli from puppies*

140 Of faecal samples from 34 dogs that contained cefalexin-resistant *E. coli*, 27 gave  
141 CTX-R isolates. PCR analysis was used to identify mobile resistance genes

142 associated with CTX-R in these isolates; where the same PCR profile was seen for  
143 multiple CTX-R isolates from a sample, a single isolate was taken forward for WGS  
144 to represent that CTX-R type and sample. In total, 29 unique isolates from these 27  
145 dogs were analysed by WGS. Of these, seven isolates were also FQ-R (**Table 3**).

146 WGS revealed a wide range of *E. coli* STs and CTX-R mechanisms (**Table 3**): ST88  
147 (one isolate with CTX-M-1; three isolates with mutations in the *ampC* promoter  
148 known to be associated with hyper-expression) was dominant, followed by ST744  
149 (three FQ-R isolates with CTX-M-1), ST963 (three isolates with CMY-2) and ST38  
150 (two isolates with CTX-M-15). Seventeen additional isolates, each representing a  
151 unique ST, were found to be carrying CTX-M-1 (three isolates), CTX-M-15 (three  
152 isolates), CTX-M-65 (one isolate), CTX-M-14 (one isolate), CMY-2 (three isolates)  
153 DHA-1 (one isolate) and *ampC* promoter mutation (five isolates).

154 Overall, therefore, AmpC-type  $\beta$ -lactamase-mediated resistance was found in 15/29  
155 isolates and CTX-M was found in 14/29. This approximately 50:50 split was also  
156 seen in a recent analysis of CTX-R *E. coli* from 53 dairy farms in South West  
157 England, where amoxicillin/clavulanate use was associated with finding AmpC-  
158 mediated CTX-R *E. coli* in farm samples (8). A study examining prescribing at small  
159 animal veterinary practices in the UK found that amoxicillin/clavulanate was the most  
160 common antibacterial prescribed, accounting for 36% of prescriptions (30), and it has  
161 been demonstrated that routine amoxicillin/clavulanate treatment selects for  
162 increased CTX-R *E. coli* in the faeces of dogs (19). It could therefore be  
163 hypothesised that the reason why clavulanic acid-insensitive AmpC-type  $\beta$ -  
164 lactamases are so common in CTX-R *E. coli* carried by dogs is because of high  
165 levels of amoxicillin/clavulanate usage in the canine population generally. However,  
166 whilst this study did not record veterinary treatments, it seems unlikely that

167 antibacterial therapy was widespread in these puppies, given their age and exclusion  
168 of puppies that had been hospitalised. This finding of AmpC dominance is therefore  
169 suggestive of transmission into the juvenile dogs in the study. There was no positive  
170 association between raw feeding and the presence of CTX-R isolates in general;  
171 only six out of 29 CTX-R isolates were from raw-fed dogs (**Table 3**). However,  
172 among these, five out of eight of the AmpC hyper-producing isolates were from raw-  
173 fed dogs. Whilst these numbers are too small for clear conclusions to be drawn, it is  
174 plausible that raw feeding may selectively seed *ampC* hyper-producer *E. coli*  
175 carriage.

176 Carriage of FQ-R *E. coli* was strongly associated with raw feeding in puppies (**Table**  
177 **2**). From 26 puppies that produced samples carrying FQ-R *E. coli*, 30 isolates were  
178 subjected to WGS (**Table 4**) in addition to the seven dual FQ-R/CTX-R isolates  
179 discussed above (**Table 3**). Plasmid-mediated quinolone resistance mechanisms  
180 (PMQR) were found in only 3/37 FQ-R isolates, and in only one ST58 isolate  
181 carrying *qnrS1* and a single *gyrA* mutation (**Table 4**) was there any suggestion that a  
182 PMQR was necessary for conferring FQ-R. The other two PMQR-carrying FQ-R  
183 isolates were also CTX-R (**Table 3**). These two were an ST1196 isolate carrying  
184 *qnrS1* and an ST1431 isolate carrying *qnrB4*, but in both there were also two  
185 mutations in *gyrA* and one in *parC*, sufficient to confer FQ-R in the absence of a  
186 PMQR gene (31). Indeed, many of the FQ-R isolates collected in this study carried  
187 identical mutations and no PMQR genes (**Table 4**). Interestingly, five of the CTX-R  
188 isolates that were not FQ-R also carried PMQRs: four had a *qnrS1* gene and one  
189 ST38 isolate had an *aac(6)-Ib-cr* gene (**Table 3**). This would support previous  
190 conclusions that carriage of these genes is not sufficient to confer FQ-R in the  
191 absence of other mechanisms (31).



192 Of the FQ-R isolates sequenced, ST744 (12/37 isolates) dominated, with 6/37  
193 isolates identified as ST162, 4/37 identified as ST1011, 3/37 identified as ST224,  
194 2/37 identified as ST1196 and individual examples of 10 other STs (**Table 3, 4**).

195

196 *Evidence of faecal carriage of CTX-R and FQ-R E. coli in puppies also causing*  
197 *urinary and bloodstream infections in humans in the same geographical area*

198 A phylogenetic analysis of all the CTX-R and FQ-R isolates from puppies subjected  
199 to WGS in this study was constructed (**Figure 1**). There were three clusters of  
200 isolates with chromosomal mutations conferring resistance: FQ-R isolates of ST162  
201 and ST744 with multiple gyrase and topoisomerase mutations and a smaller ST88  
202 cluster with chromosomal *ampC* promoter mutations conferring CTX-R and  
203 amoxicillin/clavulanate resistance. In contrast, mobile resistance mechanisms were  
204 spread widely across the phylogenetic tree. Notably, one FQ-R isolate was ST1193,  
205 which is an important clone currently emerging in human infections and of the most  
206 pathogenic phylogroup, B2 (32). It was therefore interesting to test relationships  
207 between CTX-R and FQ-R isolates from locally recruited dogs with human urinary  
208 CTX-R and FQ-R isolates from people living in the same geographical area as the  
209 locally recruited dogs (33,34) whose infections occurred within the same six-month  
210 period as collection of the canine faecal samples yielding these isolates.

211 There were four CTX-R isolates from locally recruited dogs; two of these (from two  
212 different dogs: Dog 21 and Dog 22) were ST963; the others were ST88 and ST2179  
213 (**Table 3**). None of the 225 CTX-R urinary *E. coli* (33) in the comparison was ST2179  
214 and a SNP distance analysis showed that the canine ST88 isolate was >1000 SNPs  
215 distant in the core genome from its closest ST88 human urinary isolate. A core

216 genome SNP distance of 30 or fewer is commonly seen in Enterobacteriales isolates  
217 that are confirmed to be part of an acute outbreak of foodborne illness (35). Hence,  
218 for these ST88 isolates, there was no evidence for sharing of isolates between dogs  
219 and humans. In contrast, the two canine ST963 isolates were 37 SNPs different from  
220 each other, suggesting recent sharing of the isolate. Significantly, however, the  
221 isolate from Dog 21 was <50 SNPs different from each of two human urinary ST963  
222 isolates, and the isolate from Dog 22 was <65 SNPs from these same two human  
223 urinary isolates. Even more troubling, the isolate from Dog 21 was only 34 SNPs  
224 different from a CTX-R ST963 bloodstream isolate, one of 82 CTX-R bloodstream  
225 isolates collected in parallel from clinical cases in the same geographical region at  
226 the same time. The isolate from Dog 22 was 51 SNPs different from this bloodstream  
227 isolate. The urinary and bloodstream isolates were between 31 and 38 SNPs  
228 different from each other, so this is clear evidence for sharing of the human and  
229 canine CTX-R ST963 isolates. Each of these isolates (two canine, two urinary and  
230 one bloodstream) had a mobile *bla*<sub>CMY-2</sub> gene embedded into the chromosome at the  
231 same position - proximal to *nhaRA*, *dnaJ* - which is further evidence of descent from  
232 a recent common ancestor. Most interestingly, another canine ST963 isolate was  
233 identified in this study, but not in a locally recruited dog (Dog 10, **Figure 1**). In this  
234 case, the isolate was 33, 35 and 21 SNPs different from the two urinary isolates and  
235 the bloodstream isolate, respectively, an even closer match than that seen with  
236 isolates from the two locally recruited dogs, suggesting even more recent sharing.  
237 Whilst Dog 10 was not locally recruited, it is possible that it could still be based  
238 locally as address details for the nationally recruited dogs were not available for  
239 analysis.

240 Of the seven FQ-R isolates from locally recruited puppies (**Table 3, Table 4**), five

241 were of STs found amongst 188 FQ-R urinary *E. coli* from people living in the same  
242 geographical area, isolated within six months of collection of the isolates from  
243 puppies (34). Of the canine isolates, one was ST10 and two each were ST744 and  
244 ST162 (**Table 4**). One of the ST744 isolates was 47 SNPs different from a human  
245 urinary isolate, which is suggestive of sharing, as defined above. Among the other  
246 four canine, the lowest SNP difference from a human isolate was 324, which does  
247 not suggest sharing in these cases. Interestingly, the puppy carrying the seemingly  
248 shared ST744 isolate, Dog 31, was the only FQ-R *E. coli* positive locally recruited  
249 dog reported to be fed raw meat (**Table 4**).

250

## 251 *Conclusions*

252 This study has identified raw meat feeding as a risk factor for the excretion of ABR *E.*  
253 *coli* in the faeces of 16-week-old puppies, with particularly strong impact on excretion  
254 of isolates resistant to the critically important fluoroquinolones. If owners insist on  
255 feeding raw meat to their dog, it is essential that they fully understand this practice  
256 puts their dog at risk of becoming colonised with bacteria resistant to critically  
257 important antibacterials.

258 *E. coli* is the most clinically important opportunistic human bacterial pathogen (13).  
259 ABR *E. coli* infections are more difficult to treat, and result in more morbidity and  
260 higher mortality rates (13); there is also strong evidence that domestic pet dogs  
261 transmit ABR bacteria to humans (9-12, 36,37) and this study provides clear  
262 evidence of the faecal carriage within puppies of CTX-R and FQ-R *E. coli* clonally  
263 related to those that have also caused urinary and bloodstream infections in humans  
264 living in the same geographical region collected within months of each other.

265 Therefore, if owners feed raw food to their dog, practices that mitigate the risk of  
266 onward transmission of ABR *E. coli* - which are more likely to be carried by these  
267 dogs - to humans should be encouraged. These include strict hygiene practices  
268 when anyone (particularly those vulnerable to bacterial infection) interacts with a  
269 raw-fed dog along with scrupulous disposal of the dog's faeces so that it cannot pose  
270 a risk to the general human population by contaminating the wider environment with  
271 ABR *E. coli*.

272

## 273 **Experimental**

### 274 *Recruitment of the cohorts*

275 Dog owners were recruited to take part in this study in two ways: (i) 236 were  
276 already recruited to the Dogs Trust "Generation Pup" project, a longitudinal study  
277 examining the health, welfare and behaviour of dogs across the UK (39) and (ii) 59  
278 were locally recruited via word-of-mouth advertisement to clients bringing young  
279 dogs in for routine checks to veterinary practices in Somerset and Bristol, via puppy  
280 socialisation classes and via social media as well as local media advertisement.  
281 Locally recruited owners answered survey questions (listed in **Table 1**). As part of  
282 Generation Pup, owners completed more extensive surveys relating to their dogs at  
283 16 weeks of age and responses to relevant survey questions (**Table 1**) were  
284 extracted from wider Generation Pup survey data. All dog owners also supplied a  
285 single faecal sample collected from their dog at 16 weeks of age. All dog owners  
286 were recruited between August 2017 and March 2018, and all owners gave consent.  
287 Ethical approval for this study was granted by the University of Bristol Health  
288 Sciences Student Research Ethics Committee (56783). Health status of the dogs

289 and prior veterinary treatment was not recorded for locally recruited dogs, and so  
290 was not included in the analysis. However, dogs that had been previously  
291 hospitalised were excluded.

292

### 293 *Faecal samples and processing*

294 All dog owners were supplied with a sample collection pack comprised of a  
295 specimen bottle, gloves, biohazard bag and a freepost envelope. Faecal samples  
296 were sent by post to the University of Bristol's Veterinary School alongside the  
297 consent form and, for locally recruited dogs, a questionnaire. To process each faecal  
298 sample, approximately 0.1-0.5 g of faeces was taken and weighed. Ten millilitres per  
299 gram of phosphate buffered saline (PBS) was added to the sample and the mixture  
300 vortexed. Next, 0.5 mL of the faecal/PBS homogenate was added to 0.5 mL of 50%  
301 v/v sterile glycerol and processed as below.

302

### 303 *Testing for ABR bacteria*

304 Data were collapsed into a binary "positive/negative" outcome for the homogenate  
305 derived from each faecal sample. ABR positivity was defined by the appearance  
306 (following 37°C overnight incubation) of blue/green *E. coli* colonies after spreading  
307 20 µL of faecal homogenate (or a 10-fold dilution in PBS if inoculum effect was  
308 observed) onto Tryptone Bile X-Glucuronide (TBX) agar plates containing either 0.5  
309 mg/L ciprofloxacin (to identify fluoroquinolone resistance [FQ-R]), 16 mg/L  
310 cephalixin, 8 mg/L amoxicillin, 16 mg/L tetracycline, or 64 mg/L streptomycin.  
311 Cefalexin-resistant isolates (up to five per plate) grown from primary processing of

312 faecal samples were sub-cultured onto agar plates containing 2 mg/L of cefotaxime  
313 (CTX); isolates that grew were deemed CTX-R and taken forward for further testing.  
314 These concentrations were chosen based on relevant human clinical breakpoints as  
315 defined by the European Committee on Antimicrobial Susceptibility Testing (40).  
316 Faecal homogenates were also plated onto non-antibiotic TBX agar and samples  
317 were only included in the study if  $\geq 10$  *E. coli* cfu/ $\mu$ L were detected in an undiluted  
318 faecal homogenate. Therefore, the limit of detection for ABR for all faecal  
319 homogenates included in the analysis was  $\leq 0.5\%$  prevalence.

320

### 321 *Risk factor analysis*

322 Univariable and multivariable logistic regression models were used to evaluate  
323 associations between ABR *E. coli* positivity in homogenates derived from faecal  
324 samples and risk factors identified from the survey data (Stata/IC 15.1, StataCorp  
325 LLC, College Station, TX, USA). A backward stepwise method was used. In this  
326 method the full set of possible factors was analysed, with the least significant factors  
327 removed one at a time until all remaining factors had *p*-values of 0.05 or less. For the  
328 risk factor analysis, questionnaire answers were collapsed into binary ‘Yes/No’  
329 variables; questionnaire answers of ‘sometimes’, ‘often’, ‘almost always’ and  
330 ‘frequently’ were all categorised as ‘Yes’.

331

### 332 *Isolates from human infections*

333 WGS data for 225 CTX-R and 188 FQ-R human urinary *E. coli* from a 50 x 50 km  
334 region (including the homes of the 59 locally recruited dogs collected during the  
335 same timespan as the collection of faecal samples from these puppies) has been

336 reported previously (33, 34). Eighty-two CTX-R *E. coli* bloodstream isolates from  
337 patients being treated at hospitals in this same geographical region were obtained  
338 from the regional microbiology diagnostic laboratory (Severn Pathology, Southmead  
339 Hospital, North Bristol NHS Trust). All infections occurred during the same period as  
340 puppy faecal sample collection for this study.

341

#### 342 *PCR and WGS analysis of CTX-R and FQ-R E. coli*

343 Multiplex PCR assays were used to differentiate CTX-R puppy *E. coli* isolates  
344 carrying different  $\beta$ -lactamase genes, as described previously (33). WGS of  
345 deduplicated, representative CTX-R and FQ-R isolates from puppies, together with  
346 the human CTX-R bloodstream isolates was performed by MicrobesNG  
347 (<https://microbesng.uk/>) on a HiSeq 2500 instrument (Illumina, San Diego, CA, USA)  
348 using 2x250 bp paired end reads. Reads were trimmed using Trimmomatic (41) and  
349 assembled into contigs using SPAdes (42) 3.13.0  
350 (<http://cab.spbu.ru/software/spades/>). Contigs were annotated using Prokka (43).  
351 ABR genes were assigned using the ResFinder (44) and Sequence Types  
352 designated by MLST 2.0 (45) on the Centre for Genomic Epidemiology  
353 (<http://www.genomicepidemiology.org/>) platform. Single nucleotide polymorphism  
354 (SNP) distance analysis was performed using SNP-dists  
355 (<https://github.com/tseemann/snp-dists>).

356

#### 357 *Phylogenetic analysis*

358 Sequence alignment and phylogenetic analysis was carried out using the Bioconda  
359 channel (46) on a server hosted by the Cloud Infrastructure for Microbial

360 Bioinformatics (CLIMB; 47). The reference sequence was *E. coli* ST131 isolate  
361 EC958 complete genome (accession: HG941718). Sequences were first aligned to a  
362 closed reference sequence and analysed for SNP differences, whilst omitting  
363 insertion and deletion elements, using the Snippy alignment program  
364 (<https://github.com/tseemann/snippy>). Alignment was then focused on regions of the  
365 genome common to all isolates (the “core genome”) using the Snippy-core program,  
366 thus eliminating the complicating factors of insertions and deletions. Aligned  
367 sequences were then used to construct a maximum likelihood phylogenetic tree  
368 using RAxML utilising the GTRCAT model of rate heterogeneity and the software’s  
369 autoMR and rapid bootstrap to find the best-scoring maximum likelihood tree and  
370 including tree branch lengths, defined as the number of base substitutions per site  
371 compared (48,49). Finally, phylogenetic trees were illustrated using the web-based  
372 Microreact program (50).

373

#### 374 **Acknowledgements**

375 Genome sequencing was provided by MicrobesNG (<http://www.microbesng.uk>). The  
376 authors thank Dogs Trust and Rachel Casey, Jane Murray, Rachel Kinsman and  
377 Michelle Lord for assisting with data collection from the Generation Pup project  
378 participants included in this study. The authors are grateful to all puppy owners who  
379 took part in this study.

380

#### 381 **Funding**



382 This work was funded by grant NE/N01961X/1 to MBA, TAC, KMT, KKR from the  
383 Antimicrobial Resistance Cross Council Initiative supported by the seven United  
384 Kingdom research councils. Dogs Trust fund the Generation Pup project.

385

386 **The authors declare no conflicts of interest.**

387

### 388 **Author Contributions**

389 Conceived the Study: K.K.R., M.B.A.

390 Collection of Data: K.W. O.M., J.F., K.M. supervised by T.A.C., M.B.A., K.K.R.

391 Cleaning and Analysis of Data: O.M. K.W. A.H., V.C.G., supervised by M.B.A.,

392 K.M.T., K.K.R.

393 Initial Drafting of Manuscript: K.W., O.M., K. K. R., M.B.A.

394 Corrected and Approved Manuscript: All Authors

395

### 396 **References**

397 1. Friedman ND, Temkin E, Carmeli Y. 2016. The negative impact of antibiotic  
398 resistance. *Clin Microbiol Infect.* 22:416-22.

399 2. Woolhouse M, Ward M, van Bunnik B, Farrar J. 2015. Antimicrobial resistance in  
400 humans, livestock and the wider environment. *Philos Trans R Soc Lond B Biol*  
401 *Sci.* 370:20140083.

- 402 3. Zurfluh K, Glier M, Hächler H, Stephan R. 2015. Replicon typing of plasmids  
403 carrying *bla*<sub>CTX-M-15</sub> among Enterobacteriaceae isolated at the environment,  
404 livestock and human interface. *Sci Total Environ.* 521-522:75-8.
- 405 4. Magouras I, Carmo LP, Stärk KDC, Schüpbach-Regula G. 2017. Antimicrobial  
406 Usage and -Resistance in Livestock: Where Should We Focus? *Front Vet Sci.*  
407 4:148.
- 408 5. Findlay J, Mounsey O, Lee WWY, Newbold N, Morley K, Schubert H, Gould VC,  
409 Cogan TA, Reyher KK, Avison MB. 2020. Molecular Epidemiology of *Escherichia*  
410 *coli* Producing CTX-M and pAmpC  $\beta$ -Lactamases from Dairy Farms Identifies a  
411 Dominant Plasmid Encoding CTX-M-32 but No Evidence for Transmission to  
412 Humans in the Same Geographical Region. *Appl Environ Microbiol.* 87:e01842-  
413 20.
- 414 6. Day MJ, Rodríguez I, van Essen-Zandbergen A, Dierikx C, Kadlec K, Schink AK,  
415 Wu G, Chattaway MA, DoNascimento V, Wain J, Helmuth R, Guerra B, Schwarz  
416 S, Threlfall J, Woodward MJ, Coldham N, Mevius D, Woodford N. 2016. Diversity  
417 of STs, plasmids and ESBL genes among *Escherichia coli* from humans, animals  
418 and food in Germany, the Netherlands and the UK. *J Antimicrob Chemother.*  
419 71:1178-1182.
- 420 7. Ludden C, Raven KE, Jamrozy D, Gouliouris T, Blane B, Coll F, de Goffau M,  
421 Naydenova P, Horner C, Hernandez-Garcia J, Wood P, Hadjirin N, Radakovic M,  
422 Brown NM, Holmes M, Parkhill J, Peacock SJ. 2019. One Health Genomic  
423 Surveillance of *Escherichia coli* Demonstrates Distinct Lineages and Mobile  
424 Genetic Elements in Isolates from Humans versus Livestock. *mBio.* 10:e02693-  
425 18.
- 426 8. Alzayn M, Findlay J, Schubert H, Mounsey O, Gould VC, Heesom KJ, Turner KM,

- 427 Barrett DC, Reyher KK, Avison MB. 2020. Characterization of AmpC-  
428 hyperproducing *Escherichia coli* from humans and dairy farms collected in  
429 parallel in the same geographical region. *J Antimicrob Chemother* 75:2471-2479.
- 430 9. Toombs-Ruane LJ, Benschop J, French NP, Biggs PJ, Midwinter AC, Marshall  
431 JC, Chan M, Drinković D, Fayaz A, Baker MG, Douwes J, Roberts MG, Burgess  
432 SA. 2020. Carriage of extended-spectrum beta-lactamase-and AmpC beta-  
433 lactamase-producing *Escherichia coli* from humans and pets in the same  
434 households. *Appl Environ Microbiol.* 86:e01613-20.
- 435 10. Kidsley AK, White RT, Beatson SA, Saputra S, Schembri MA, Gordon D,  
436 Johnson JR, O'Dea M, Mollinger JL, Abraham S, Trott DJ. 2020. Companion  
437 Animals Are Spillover Hosts of the Multidrug-Resistant Human Extraintestinal  
438 *Escherichia coli* Pandemic Clones ST131 and ST1193. *Front Microbiol.* 11:1968.
- 439 11. Hong JS, Song W, Park HM, Oh JY, Chae JC, Jeong S, Jeong SH. 2020.  
440 Molecular Characterization of Fecal Extended-Spectrum  $\beta$ -Lactamase- and  
441 AmpC  $\beta$ -Lactamase-Producing *Escherichia coli* From Healthy Companion  
442 Animals and Cohabiting Humans in South Korea. *Front Microbiol.* 11:674.
- 443 12. Hong JS, Song W, Park HM, Oh JY, Chae JC, Shin S, Jeong SH. 2019. Clonal  
444 Spread of Extended-Spectrum Cephalosporin-Resistant Enterobacteriaceae  
445 Between Companion Animals and Humans in South Korea. *Front Microbiol.*  
446 10:1371.
- 447 13. Adler A, Katz DE, Marchaim D. 2016. The Continuing Plague of Extended-  
448 spectrum  $\beta$ -lactamase-producing Enterobacteriaceae Infections. *Infect Dis Clin*  
449 *North Am.* 30:347-375.
- 450 14. Amos GC, Hawkey PM, Gaze WH, Wellington EM. 2014. Waste water effluent  
451 contributes to the dissemination of CTX-M-15 in the natural environment. *J*

- 452 Antimicrob Chemother. 69:1785-91.
- 453 15. Leonard AFC, Zhang L, Balfour AJ, Garside R, Hawkey PM, Murray AK,  
454 Ukoumunne OC, Gaze WH. 2018. Exposure to and colonisation by antibiotic-  
455 resistant *E. coli* in UK coastal water users: Environmental surveillance, exposure  
456 assessment, and epidemiological study (Beach Bum Survey). Environ Int.  
457 114:326-333.
- 458 16. Schmidt M, Unterer S, Suchodolski JS, Honneffer JB, Guard BC, Lidbury JA,  
459 Steiner JM, Fritz J, Kölle P. 2018. The fecal microbiome and metabolome differs  
460 between dogs fed Bones and Raw Food (BARF) diets and dogs fed commercial  
461 diets. PLoS One. 13:e0201279.
- 462 17. Gibson JS, Morton JM, Cobbold RN, Filippich LJ, Trott DJ. 2011. Risk factors for  
463 dogs becoming rectal carriers of multidrug-resistant *Escherichia coli* during  
464 hospitalization. Epidemiol Infect. 139:1511-21.
- 465 18. Ogeer-Gyles J, Mathews KA, Sears W, Prescott JF, Weese JS, Boerlin P. 2006.  
466 Development of antimicrobial drug resistance in rectal *Escherichia coli* isolates  
467 from dogs hospitalized in an intensive care unit. J Am Vet Med Assoc. 229:694-9.
- 468 19. Schmidt VM, Pinchbeck G, McIntyre KM, Nuttall T, McEwan N, Dawson S,  
469 Williams NJ. 2018. Routine antibiotic therapy in dogs increases the detection of  
470 antimicrobial-resistant faecal *Escherichia coli*. J Antimicrob Chemother. 73:3305-  
471 3316.
- 472 20. Prescott JF, Boerlin P. 2016. Antimicrobial use in companion animals and Good  
473 Stewardship Practice. Vet Rec. 179:486-488.
- 474 21. Wedley AL, Dawson S, Maddox TW, Coyne KP, Pinchbeck GL, Clegg P, Nuttall  
475 T, Kirchner M, Williams NJ. 2017. Carriage of antimicrobial resistant *Escherichia*  
476 *coli* in dogs: Prevalence, associated risk factors and molecular characteristics.

- 477 Vet Microbiol. 199:23-30.
- 478 22. Grønvold AM, L'abée-Lund TM, Sørum H, Skancke E, Yannarell AC, Mackie RI.  
479 2010. Changes in fecal microbiota of healthy dogs administered amoxicillin.  
480 FEMS Microbiol Ecol. 71:313-26.
- 481 23. Leite-Martins LR, Mahú MI, Costa AL, Mendes A, Lopes E, Mendonça DM, Niza-  
482 Ribeiro JJ, de Matos AJ, da Costa PM. 2014. Prevalence of antimicrobial  
483 resistance in enteric *Escherichia coli* from domestic pets and assessment of  
484 associated risk markers using a generalized linear mixed model. Prev Vet Med.  
485 117:28-39.
- 486 24. Schmidt VM, Pinchbeck GL, Nuttall T, McEwan N, Dawson S, Williams NJ. 2015.  
487 Antimicrobial resistance risk factors and characterisation of faecal *E. coli* isolated  
488 from healthy Labrador retrievers in the United Kingdom. Prev Vet Med. 119:31-  
489 40.
- 490 25. Baede VO, Wagenaar JA, Broens EM, Duim B, Dohmen W, Nijse R,  
491 Timmerman AJ, Hordijk J. 2015. Longitudinal study of extended-spectrum- $\beta$ -  
492 lactamase- and AmpC-producing Enterobacteriaceae in household dogs.  
493 Antimicrob Agents Chemother. 59:3117-24.
- 494 26. Day MJ, Horzinek MC, Schultz RD, Squires RA; Vaccination Guidelines Group  
495 (VGG) of the World Small Animal Veterinary Association (WSAVA). 2016.  
496 WSAVA Guidelines for the vaccination of dogs and cats. J Small Anim Pract.  
497 57:E1-E45.
- 498 27. Costa D, Vinué L, Poeta P, Coelho AC, Matos M, Sáenz Y, Somalo S, Zarazaga  
499 M, Rodrigues J, Torres C. 2009. Prevalence of extended-spectrum beta-  
500 lactamase-producing *Escherichia coli* isolates in faecal samples of broilers. Vet  
501 Microbiol. 138:339-44.

- 502 28. Warren RE, Ensor VM, O'Neill P, Butler V, Taylor J, Nye K, Harvey M, Livermore  
503 DM, Woodford N, Hawkey PM. 2008. Imported chicken meat as a potential  
504 source of quinolone-resistant *Escherichia coli* producing extended-spectrum  
505 beta-lactamases in the UK. J Antimicrob Chemother. 61:504-8.
- 506 29. Randall LP, Clouting C, Horton RA, Coldham NG, Wu G, Clifton-Hadley FA,  
507 Davies RH, Teale CJ. 2011. Prevalence of *Escherichia coli* carrying extended-  
508 spectrum  $\beta$ -lactamases (CTX-M and TEM-52) from broiler chickens and turkeys  
509 in Great Britain between 2006 and 2009. J Antimicrob Chemother. 66:86-95.
- 510 30. Radford AD, Noble PJ, Coyne KP, Gaskell RM, Jones PH, Bryan JG, Setzkorn C,  
511 Tierney Á, Dawson S. 2011. Antibacterial prescribing patterns in small animal  
512 veterinary practice identified via SAVSNET: the small animal veterinary  
513 surveillance network. Vet Rec. 169:310.
- 514 31. Wan Nur Ismah WAK, Takebayashi Y, Findlay J, Heesom KJ, Jiménez-  
515 Castellanos JC, Zhang J, Graham L, Bowker K, Williams OM, MacGowan AP,  
516 Avison MB. 2018. Prediction of Fluoroquinolone Susceptibility Directly from  
517 Whole-Genome Sequence Data by Using Liquid Chromatography-Tandem Mass  
518 Spectrometry to Identify Mutant Genotypes. Antimicrob Agents Chemother.  
519 62:e01814-17.
- 520 32. Tchesnokova V, Radey M, Chattopadhyay S, Larson L, Weaver JL, Kisiela D,  
521 Sokurenko EV. 2019. Pandemic fluoroquinolone resistant *Escherichia coli* clone  
522 ST1193 emerged via simultaneous homologous recombinations in 11 gene loci.  
523 Proc Natl Acad Sci U S A. 116:14740-14748.
- 524 33. Findlay J, Gould VC, North P, Bowker KE, Williams MO, MacGowan AP, Avison  
525 MB. 2020. Characterization of cefotaxime-resistant urinary *Escherichia coli* from  
526 primary care in South-West England 2017-18. J Antimicrob Chemother. 75:65-71.

- 527 34. Mounsey O, Schubert H, Findlay J, Morley K, Puddy EF, Gould VC, North P,  
528 Bowker KE, Williams OM, Williams PB, Barrett DC, Cogan TA, Turner KM,  
529 MacGowan AP, Reyher KK, Avison MB. 2021. Infrequent Sharing of  
530 Fluoroquinolone-Resistant *Escherichia coli* from Dairy Farms as a Cause of  
531 Bacteriuria in Humans Living in the Same Geographical Region. *BioRxiv*
- 532 35. Pightling AW, Pettengill JB, Luo Y, Baugher JD, Rand H, Strain E. 2018.  
533 Interpreting Whole-Genome Sequence Analyses of Foodborne Bacteria for  
534 Regulatory Applications and Outbreak Investigations. *Front Microbiol.* 9:1482.
- 535 36. Ewers C, Bethe A, Semmler T, Guenther S, Wieler LH. 2012. Extended-spectrum  
536  $\beta$ -lactamase-producing and AmpC-producing *Escherichia coli* from livestock and  
537 companion animals, and their putative impact on public health: a global  
538 perspective. *Clin Microbiol Infect.* 18:646-55.
- 539 37. Gandolfi-Decristophoris P, Petrini O, Ruggeri-Bernardi N, Schelling E. 2013.  
540 Extended-spectrum  $\beta$ -lactamase-producing Enterobacteriaceae in healthy  
541 companion animals living in nursing homes and in the community. *Am J Infect*  
542 *Control.* 41:831-5.
- 543 38. Timofte D, Maciuca IE, Williams NJ, Wattret A, Schmidt V. 2016. Veterinary  
544 Hospital Dissemination of CTX-M-15 Extended-Spectrum Beta-Lactamase-  
545 Producing *Escherichia coli* ST410 in the United Kingdom. *Microb Drug Resist.*  
546 22:609-615.
- 547 39. Murray JK, Kinsman RH, Lord MS, Da Costa REP, Woodward JL, Owczarczak-  
548 Garstecka SC, Tasker S, Knowles TG, Casey RA. 2021. 'Generation Pup' -  
549 protocol for a longitudinal study of dog behaviour and health. *BMC Vet Res.* 17:1.
- 550 40. EUCAST. Breakpoint tables for interpretation of MICs and zone diameters.  
551 Version

- 552 8.1.[http://www.eucast.org/fileadmin/src/media/PDFs/EUCAST\\_files/Breakpoint\\_tables/v\\_8.1\\_Breakpoint\\_Tables.pdf](http://www.eucast.org/fileadmin/src/media/PDFs/EUCAST_files/Breakpoint_tables/v_8.1_Breakpoint_Tables.pdf).
- 553
- 554 41. Bolger AM, Lohse M, Usadel B. 2014. Trimmomatic: a flexible trimmer for  
555 Illumina sequence data. *Bioinformatics*. 30:2114–2120.
- 556 42. Bankevich A, Nurk S, Antipov D, Gurevich AA, Dvorkin M, Kulikov AS, Lesin VM,  
557 Nikolenko SI, Pham S, Prjibelski AD, Pyshkin AV, Sirotkin AV, Vyahhi N, Tesler  
558 G, Alekseyev MA, Pevzner PA. 2012. SPAdes: a new genome assembly  
559 algorithm and its applications to single-cell sequencing. *J Comput Biol*. 19:455–  
560 477.
- 561 43. Seemann T. 2014. Prokka: rapid prokaryotic genome annotation. *Bioinformatics*.  
562 30:2068–2069.
- 563 44. Zankari E, Hasman H, Cosentino S, Vestergaard M, Rasmussen S, Lund O,  
564 Aarestrup FM, Larsen MV. 2012. Identification of acquired antimicrobial  
565 resistance genes. *J Antimicrob Chemother*. 67:2640–2644.
- 566 45. Wirth T, Falush D, Lan R, Colles F, Mensa P, Wieler LH, Karch H, Reeves PR,  
567 Maiden MC, Ochman H, Achtman M. 2006. Sex and virulence in *Escherichia coli*:  
568 an evolutionary perspective. *Mol Microbiol*. 60:1136–1151.
- 569 46. Grüning B, Dale R, Sjödin A, Chapman BA, Rowe J, Tomkins-Tinch CH, Valieris  
570 R, Köster J; Bioconda Team. 2018. Bioconda: sustainable and comprehensive  
571 software distribution for the life sciences. *Nat Methods*. 15:475–476.
- 572 47. Connor TR, Loman NJ, Thompson S, Smith A, Southgate J, Poplawski R, Bull  
573 MJ, Richardson E, Ismail M, Thompson SE, Kitchen C, Guest M, Bakke M,  
574 Sheppard SK, Pallen MJ. 2016. CLIMB (the Cloud Infrastructure for Microbial  
575 Bioinformatics): an online resource for the medical microbiology community.  
576 *Microb Genom*. 2:e000086.



- 577 48. Stamatakis A, Ludwig T, Meier H. 2005. RAxML-III: a fast program for maximum  
578 likelihood-based inference of large phylogenetic trees. *Bioinformatics*. 21:456–  
579 463.
- 580 49. Stamatakis A. 2006. RAxML-VI-HPC: maximum likelihood-based phylogenetic  
581 analyses with thousands of taxa and mixed models. *Bioinformatics*. 22:2688–  
582 2690.
- 583 50. Argimón S, Abudahab K, Goater RJE, Fedosejev A, Bhai J, Glasner C, Feil EJ,  
584 Holden MTG, Yeats CA, Grundmann H, Spratt BG, Aanensen DM. 2016.  
585 Microreact: visualizing and sharing data for genomic epidemiology and  
586 phylogeography. *Microb Genom*. 2:e000093.
- 587

588 **Tables**

589

590 **Table 1.** Baseline data for all 16-week-old dogs (n=223) and associations with risk  
 591 factors for carriage of *E. coli* resistant to at least one test antibacterial. *p*-values were  
 592 calculated using the Pearson Chi-squared test (Stata/IC 15.1, StataCorp LLC,  
 593 College Station, TX, USA). The bold figures show a *p*-value < 0.05.

| <b>Risk factor from questionnaire</b> | <b>Response to question</b> | <b>Response to question total (n=223)</b> | <b>Also resistant to at least one antibiotic (n=106)</b> | <b><i>p</i>-value</b> |
|---------------------------------------|-----------------------------|-------------------------------------------|----------------------------------------------------------|-----------------------|
| Fed raw food                          | Yes                         | 43                                        | 32/43                                                    | <0.001                |
|                                       | No                          | 180                                       | 76/180                                                   |                       |
| Walked in town                        | Yes                         | 181                                       | 84/181                                                   | 0.21                  |
|                                       | No                          | 42                                        | 24/42                                                    |                       |
| Walked on farmland                    | Yes                         | 142                                       | 69/142                                                   | 0.95                  |
|                                       | No                          | 81                                        | 39/81                                                    |                       |
| Walked on beaches                     | Yes                         | 103                                       | 52/103                                                   | 0.57                  |
|                                       | No                          | 120                                       | 56/120                                                   |                       |
| Walked in the countryside             | Yes                         | 191                                       | 95/191                                                   | 0.34                  |
|                                       | No                          | 32                                        | 13/32                                                    |                       |
| Walking near cattle                   | Yes                         | 84                                        | 37/70                                                    | 0.31                  |
|                                       | No                          | 139                                       | 71/139                                                   |                       |
| Swum/ paddled/ played in salt water   | Yes                         | 62                                        | 32/62                                                    | 0.56                  |
|                                       | No                          | 161                                       | 76/161                                                   |                       |
| Swum/ paddled/ played in lake water   | Yes                         | 29                                        | 17/29                                                    | 0.24                  |
|                                       | No                          | 194                                       | 91/194                                                   |                       |
| Swum/ paddled/ played in river water  | Yes                         | 66                                        | 33/66                                                    | 0.76                  |
|                                       | No                          | 157                                       | 75/157                                                   |                       |
| Swum/ paddled/ played in pond water   | Yes                         | 65                                        | 38/65                                                    | 0.06                  |
|                                       | No                          | 158                                       | 70/158                                                   |                       |

594

595

596 **Table 2.** Univariable and multivariable logistic regression analyses using  
 597 questionnaire data and antibacterial-resistant *E. coli* data for 16-week-old dogs  
 598 (n=223). Presentation: Odds ratio (95% confidence interval) *p*-value. Only risk actors  
 599 significantly associated with resistance (*p*-value < 0.05) are included.

| <b>Risk Factor</b>                                      | <b>Univariable<br/>(n=223)</b> | <b>Multivariable for all samples<br/>(n=223)</b> |
|---------------------------------------------------------|--------------------------------|--------------------------------------------------|
| <b>Resistance to at least one antibacterial (n=108)</b> |                                |                                                  |
| Fed raw food                                            | 3.98 (1.89 to 8.40)<br><0.001  | 3.98 (1.89 to 8.40) <0.001                       |
| <b>Resistance to ciprofloxacin (n=26)</b>               |                                |                                                  |
| Fed raw food                                            | 12.42 (5.01 to 30.78) <0.001   | 12.42 (5.01 to 30.78) <0.001                     |
| <b>Resistance to tetracycline (n=81)</b>                |                                |                                                  |
| Fed raw food                                            | 4.47 (2.21 to 9.05) <0.001     | 4.47 (2.21 to 9.05) <0.001                       |
| <b>Resistance to amoxicillin (n=93)</b>                 |                                |                                                  |
| Fed raw food                                            | 3.30 (1.64 to 6.63) 0.001      | 3.18 (1.57 to 6.42) 0.001                        |
| Swam/paddled/<br>played in pond<br>water                | 2.01 (1.12 to 3.61) 0.02       | 1.91 (1.05 to 3.48) 0.04                         |
| <b>Resistance to cephalexin (n=34)</b>                  |                                |                                                  |
| No statistically significant risk factors identified    |                                |                                                  |
| <b>Resistance to streptomycin (n=51)</b>                |                                |                                                  |
| Fed raw food                                            | 8.23 (3.95 to 17.15) <0.001    | 8.23 (3.95 to 17.15) <0.001                      |

600

601

602 **Table 3.** Characterisation of CTX-R *E. coli* from puppies using WGS. Stars denote  
 603 locally recruited dogs. Bold underlining denotes dogs fed raw food.

| Dog ID                 | <i>E. coli</i> ST | FQ-R mechanism(s)                                                      | CTX-R mechanism       |
|------------------------|-------------------|------------------------------------------------------------------------|-----------------------|
| DOG 1                  | ST372             |                                                                        | CMY-2                 |
| DOG 2                  | ST10              |                                                                        | CTX-M-1               |
| DOG 3**                | ST2179            | <i>gyrA</i> S83L; <i>parC</i> S80I                                     | CTX-M-65              |
| DOG 4                  | ST744             | <i>gyrA</i> S83L; <i>gyrA</i> D87N; <i>parC</i> A56T; <i>parC</i> S80I | CTX-M-1               |
| DOG 5                  | ST38              | ( <i>gyrA</i> S83L; <i>aac(6')-Ib-cr</i> )                             | CTX-M-15              |
| DOG 6                  | ST58              |                                                                        | <i>ampC</i><br>-42C>T |
| DOG 7                  | ST88              |                                                                        | CTX-M-1               |
| <b><u>DOG 8</u></b>    | ST88              |                                                                        | <i>ampC</i><br>-42C>T |
| DOG 9                  | ST38              | ( <i>qnrS1</i> )                                                       | CTX-M-15              |
| DOG 10                 | ST963             |                                                                        | CMY-2                 |
| DOG 11                 | ST1196            | <i>gyrA</i> S83L; <i>gyrA</i> D87N; <i>parC</i> S80I; <i>qnrB4</i>     | DHA-1                 |
| DOG 12                 | ST215             | ( <i>qnrS1</i> )                                                       | CTX-M-15              |
| DOG 13                 | ST973             |                                                                        | CMY-2                 |
| DOG 15                 | ST6096            |                                                                        | CMY-2                 |
| DOG 16                 | ST3889            | ( <i>qnrS1</i> )                                                       | CTX-M-15              |
| <b><u>DOG 18</u></b>   | ST744             | <i>gyrA</i> S83L; <i>gyrA</i> D87N; <i>parC</i> A56T; <i>parC</i> S80I | CTX-M-1               |
| DOG 21**               | ST69              | ( <i>qnrS1</i> )                                                       | CTX-M-14              |
| DOG 21**               | ST963             |                                                                        | CMY-2                 |
| DOG 22**               | ST963             |                                                                        | CMY-2                 |
| DOG 23                 | ST744             | <i>gyrA</i> S83L; <i>gyrA</i> D87N; <i>parC</i> A56T; <i>parC</i> S80I | CTX-M-1               |
| DOG 25                 | ST155             |                                                                        | <i>ampC</i><br>-42C>T |
| <b><u>DOG 27</u></b>   | ST88              | ( <i>gyrA</i> S83L)                                                    | <i>ampC</i><br>-42C>T |
| <b><u>DOG 27</u></b>   | ST1431            | <i>gyrA</i> S83L; <i>gyrA</i> D87N; <i>parC</i> S80I; <i>qnrS1</i>     | <i>ampC</i><br>-42C>T |
| <b><u>DOG 28</u></b>   | ST602             |                                                                        | <i>ampC</i><br>-42C>T |
| DOG 29                 | ST4988            | <i>gyrA</i> S83L; <i>gyrA</i> D87N; <i>parC</i> S80I                   | CTX-M-15              |
| <b><u>DOG 31**</u></b> | ST88              |                                                                        | <i>ampC</i><br>-42C>T |
| DOG 42                 | ST1056            |                                                                        | CTX-M-1               |
| DOG 43                 | ST75              |                                                                        | <i>ampC</i><br>-42C>T |
| DOG 44                 | ST961             |                                                                        | CTX-M-1               |

604

605 **Table 4.** Characterisation of FQ-R *E. coli* from puppies using WGS. Stars denote  
 606 locally recruited dogs. Bold underlining denotes dogs fed raw food.

| Dog ID                 | <i>E. coli</i> ST | FQ-R mechanism(s)                                                       |
|------------------------|-------------------|-------------------------------------------------------------------------|
| DOG 4                  | ST744             | <i>gyrA</i> S83L; <i>gyrA</i> D87N; <i>parC</i> A56T; <i>parC</i> S80I  |
| <b><u>DOG 9</u></b>    | ST162             | <i>gyrA</i> S83L; <i>gyrA</i> D87N; <i>parC</i> S80I                    |
| DOG 10                 | ST224             | <i>gyrA</i> S83L; <i>gyrA</i> D87N; <i>parC</i> S80I                    |
| DOG 14                 | ST162             | <i>gyrA</i> S83L; <i>gyrA</i> D87N; <i>parC</i> S80I                    |
| <b><u>DOG 16</u></b>   | ST744             | <i>gyrA</i> S83L; <i>gyrA</i> D87N; <i>parC</i> A56T; <i>parC</i> S80I  |
| <b><u>DOG 17</u></b>   | ST453             | <i>gyrA</i> S83L; <i>gyrA</i> D87N; <i>parC</i> S80I                    |
| <b><u>DOG 17</u></b>   | ST58              | <i>gyrA</i> S83L; <i>qnrS1</i>                                          |
| <b><u>DOG 17</u></b>   | ST744             | <i>gyrA</i> S83L; <i>gyrA</i> D87N; <i>parC</i> A56T; <i>parC</i> S80I  |
| <b><u>DOG 18</u></b>   | ST224             | <i>gyrA</i> S83L; <i>gyrA</i> D87N; <i>parC</i> S80I                    |
| <b><u>DOG 19</u></b>   | ST744             | <i>gyrA</i> S83L; <i>gyrA</i> D87N; <i>parC</i> A56T; <i>parC</i> S80I  |
| <b><u>DOG 20</u></b>   | ST162             | <i>gyrA</i> S83L; <i>gyrA</i> D87N; <i>parC</i> S80I                    |
| DOG 21**               | ST10              | <i>gyrA</i> S83L; <i>gyrA</i> D87N; <i>parC</i> S80I                    |
| <b><u>DOG 24</u></b>   | ST744             | <i>gyrA</i> S83L; <i>gyrA</i> D87N; <i>parC</i> A56T; <i>parC</i> S80I  |
| <b><u>DOG 26</u></b>   | ST1196            | <i>gyrA</i> S83L; <i>gyrA</i> D87N; <i>parC</i> S80I                    |
| <b><u>DOG 26</u></b>   | ST1011            | <i>gyrA</i> S83L; <i>gyrA</i> D87N; <i>parC</i> S80I                    |
| <b><u>DOG 30</u></b>   | ST744             | <i>gyrA</i> S83L; <i>gyrA</i> D87N; <i>parC</i> A56T; <i>parC</i> S80I  |
| <b><u>DOG 31**</u></b> | ST744             | <i>gyrA</i> S83L; <i>gyrA</i> D87N; <i>parC</i> A56T; <i>parC</i> S80I  |
| DOG 32**               | ST162             | <i>gyrA</i> S83L; <i>gyrA</i> D87N; <i>parC</i> S80I                    |
| DOG 33                 | ST542             | <i>gyrA</i> S83L; <i>parC</i> S80I                                      |
| <b><u>DOG 34</u></b>   | ST1011            | <i>gyrA</i> S83L; <i>gyrA</i> D87N; <i>parC</i> S80I                    |
| <b><u>DOG 34</u></b>   | ST6817            | <i>gyrA</i> S83L; <i>gyrA</i> D87N; <i>parC</i> S80I                    |
| DOG 35                 | ST1011            | <i>gyrA</i> S83L; <i>gyrA</i> D87N; <i>parC</i> S80I                    |
| DOG 35                 | ST224             | <i>gyrA</i> S83L; <i>gyrA</i> D87N; <i>parC</i> S80I                    |
| <b><u>DOG 36</u></b>   | ST155             | <i>gyrA</i> S83L; <i>gyrA</i> D87N; <i>parC</i> S80I                    |
| DOG 37                 | ST744             | <i>gyrA</i> S83L; <i>gyrA</i> D87N; <i>parC</i> A56T; <i>parC</i> S80I  |
| DOG 37                 | ST162             | <i>gyrA</i> S83L; <i>gyrA</i> D87N; <i>parC</i> S80I                    |
| DOG 38**               | ST744             | <i>gyrA</i> S83L; <i>gyrA</i> D87N; <i>parC</i> A56T; <i>parC</i> S80I  |
| DOG 39**               | ST162             | <i>gyrA</i> S83L; <i>gyrA</i> D87N; <i>parC</i> S80I                    |
| DOG 40                 | ST1193            | <i>gyrA</i> S83L; <i>gyrA</i> D87N; <i>parC</i> S80I; <i>parE</i> L416F |
| DOG 41**               | ST1011            | <i>gyrA</i> S83L; <i>gyrA</i> D87N; <i>parC</i> S80I                    |

607

608 **Figure 1:** Core genome phylogenetic analysis of antibacterial-resistant *E. coli* from  
609 puppies. CTX-R isolates are labelled red, FQ-R isolates are labelled green and CTX-  
610 R/FQ-R dual-resistant isolates are labelled yellow. The randomly assigned Dog ID  
611 relevant to each isolate is also labelled.

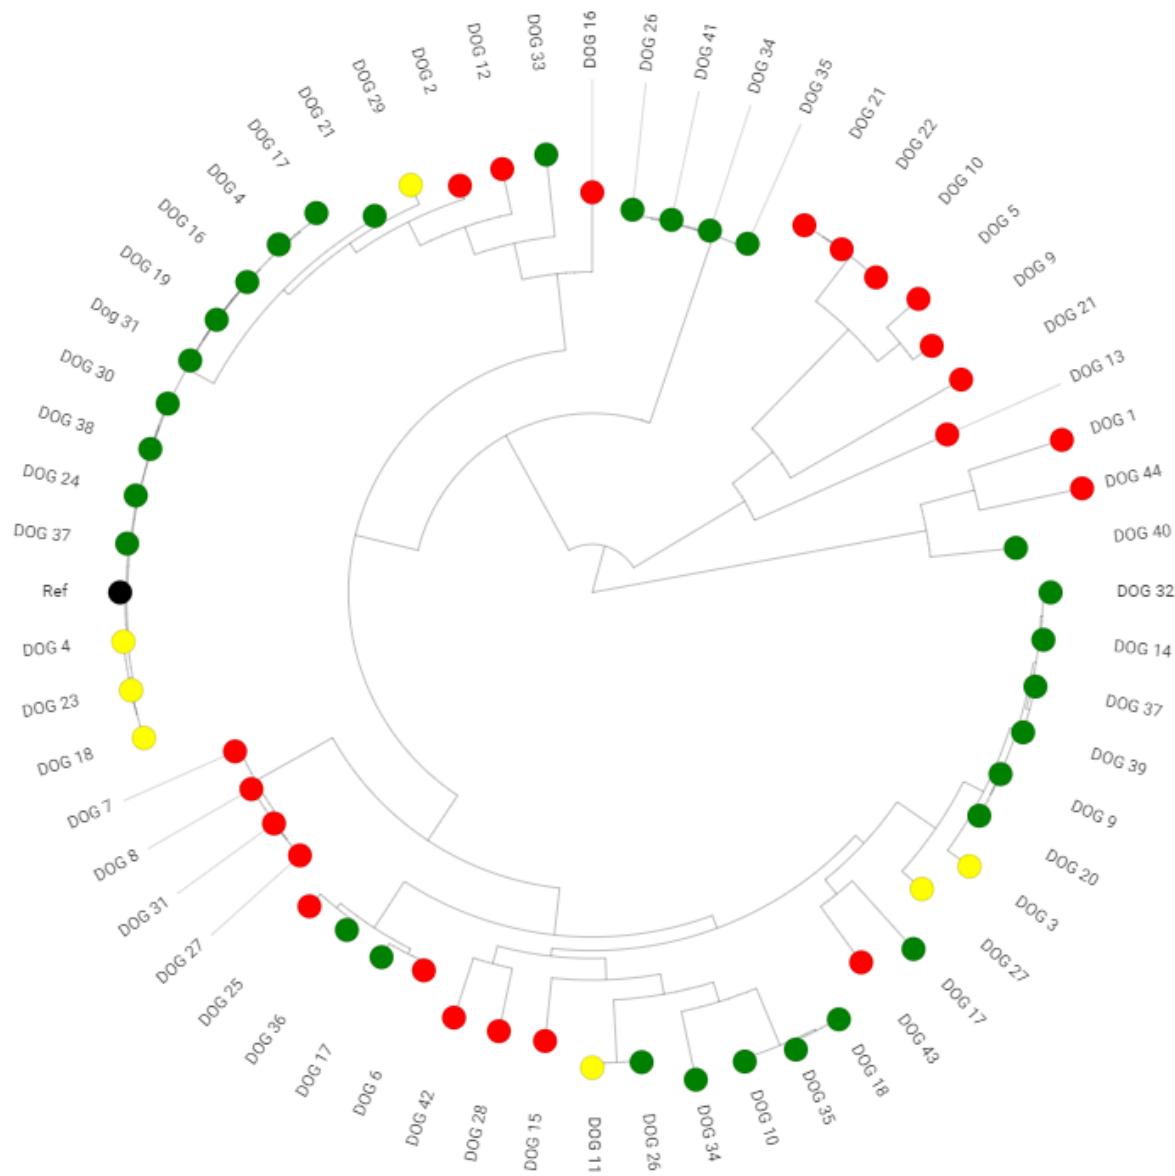

612
